# Supplementary material for: The TORC1 phosphoproteome in C. elegans reveals roles in transcription and autophagy
Source: PubMed Central journal article supplement — iScience. 2022 Mar 31;25(5):104186. doi: 10.1016/j.isci.2022.104186 (PMC9036118; doi:10.1016/j.isci.2022.104186), 2022-03-31
Supplement: mmc1.pdf [file mmc1.pdf]

iScience, Volume 25

## **Supplemental information**

### **The TORC1 phosphoproteome in *C. elegans* reveals roles in transcription and autophagy**

**Aileen K. Sewell, Zachary C. Poss, Christopher C. Ebmeier, Jeremy R. Jacobsen, William M. Old, and Min Han**

# Supplemental Figure 1

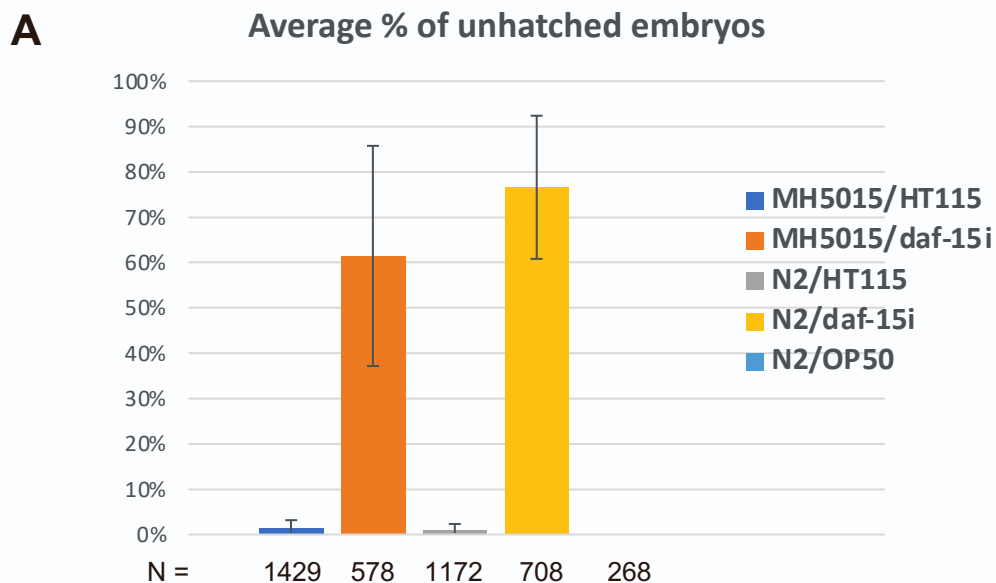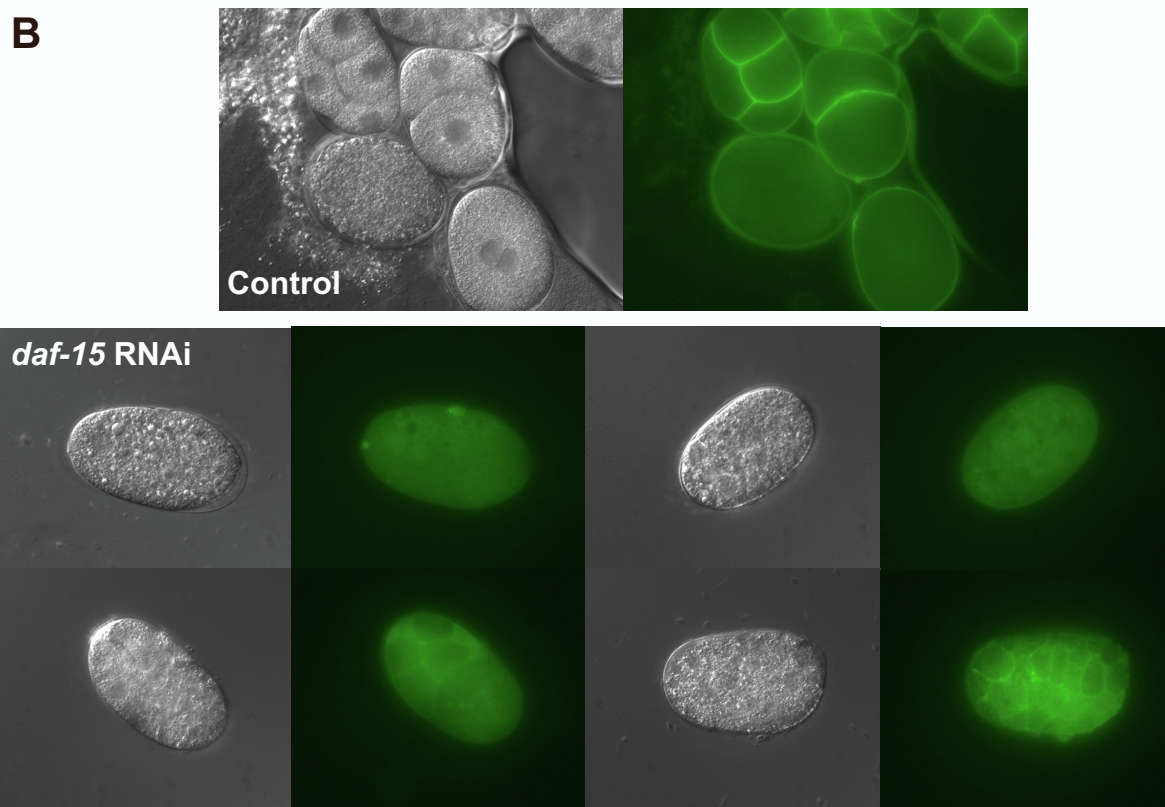

**Supplemental Figure 1, related to Figure 2. *daf-15(RNAi)* causes an embryonic hatching defect.**

**A.** Bar graph quantification of the % of unhatched embryos found within a population with the noted treatment [HT115 empty vector control strain, *daf-15(RNAi)* or OP50 *E. coli*]. This embryonic phenotype was seen in both treated wild-type (N2) and cas9 DAF-15::mCherry (MH5015) worms. Graph represents the average of 4 or more replicates. N = number embryos scored. Error bars are StdDev. **B.** Representative microscopy images of OD95 embryos from mothers fed either the RNAi control strain (upper panel) or *daf-15(RNAi)* (lower panels). The GFP plasma membrane marker PH(PLCdelta1) highlights the lack of organized structures in the *daf-15(RNAi)*-treated sample.

## Supplemental Figure 2

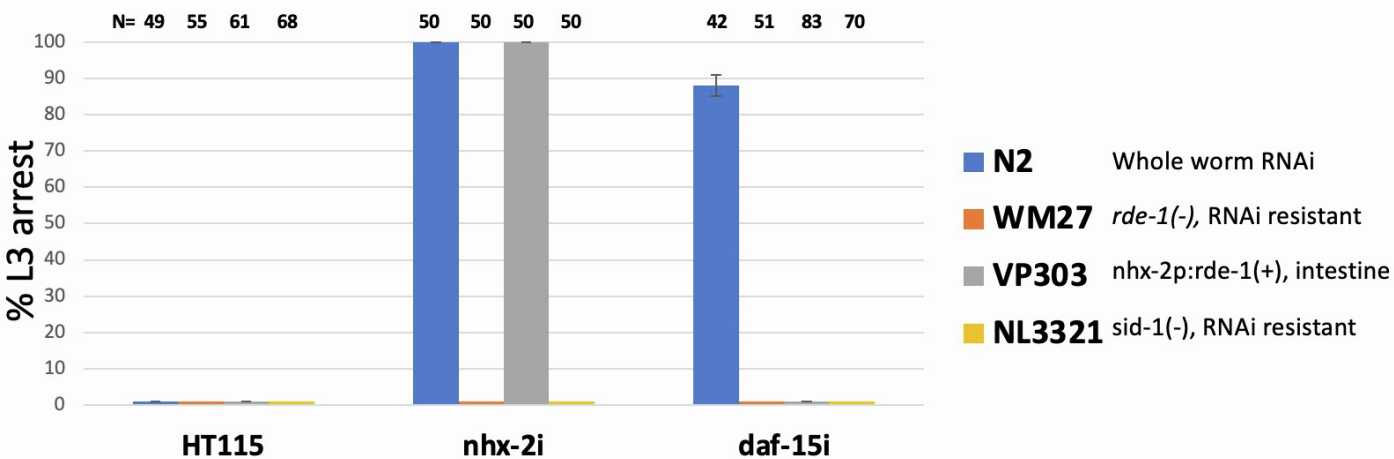

### Supplemental Figure 2, related to Figure 3. *daf-15(RNAi)* in multiple tissues is required to cause larval arrest.

Bar graph quantification of feeding RNAi results [HT115 control, *nhx-2(RNAi)*, and *daf-15(RNAi)*] in wild type (N2) and tissue-specific RNAi mutant worms. Data are represented as percentage of population arrested at L3 stage. N = number embryos scored. Error bars are StdDev. Only whole worm RNAi in N2 was sufficient to cause larval arrest with *daf-15(RNAi)*. Intestine-specific *daf-15(RNAi)* had no impact on development. *nhx-2(RNAi)* is provided as an intestine-specific target and control.
